# Supplementary material for: Fetal growth restriction and placental defects in obese mice are associated with impaired decidualisation: the role of increased leptin signalling modulators SOCS3 and PTPN2
Source: PubMed Central journal article supplement (PMC11335253; doi:10.1007/s00018-024-05336-7), 2024-08-01

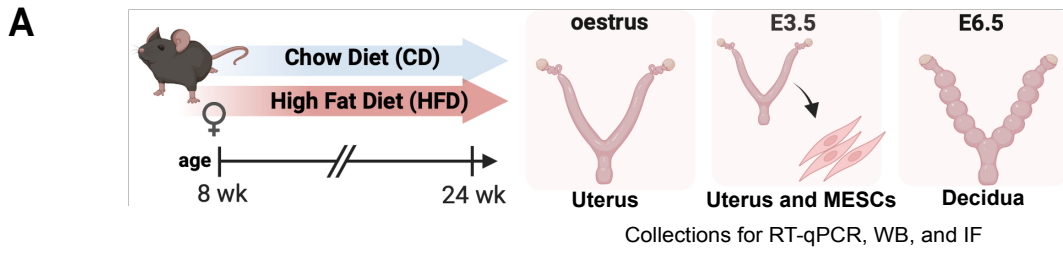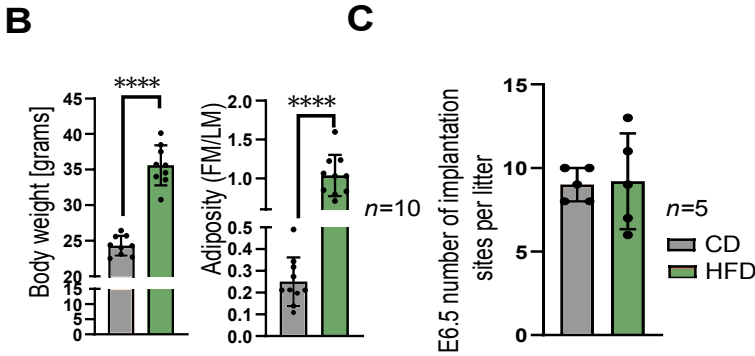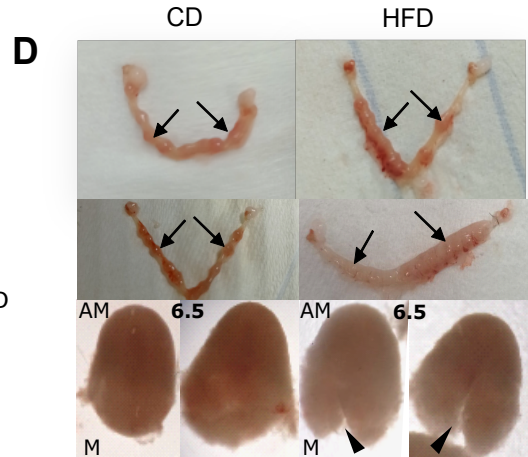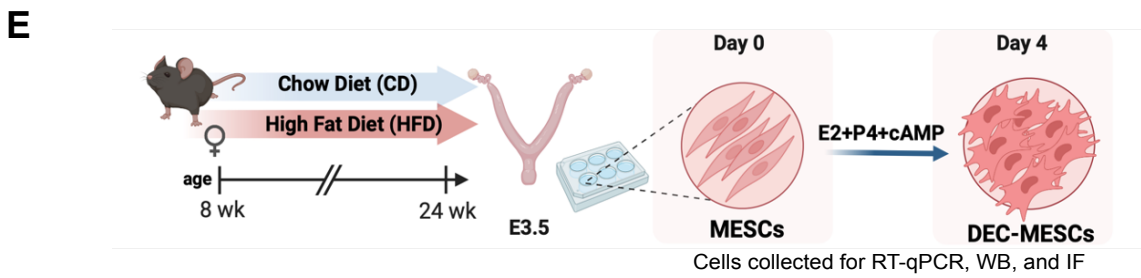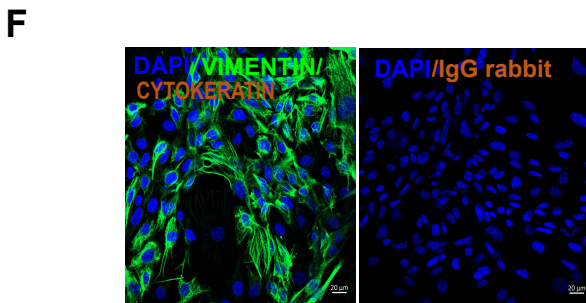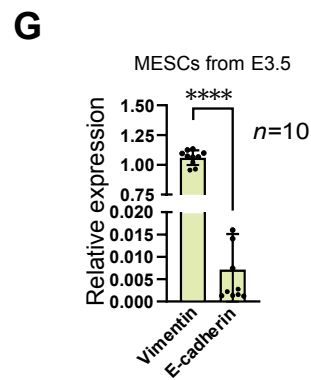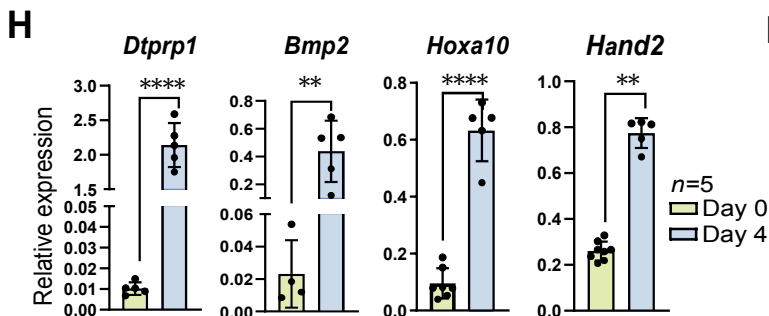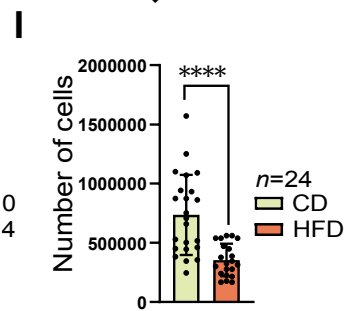

Supplement: 18_2024_5336_MOESM1_ESM.pdf [file 18_2024_5336_MOESM1_ESM.pdf]
